# Supplementary material
Source: Springer Nature journal article supplement (https://www.springerprofessional.de/resource/supplementary/13673_2013_44_MOESM1_ESM.pdf/11899386)

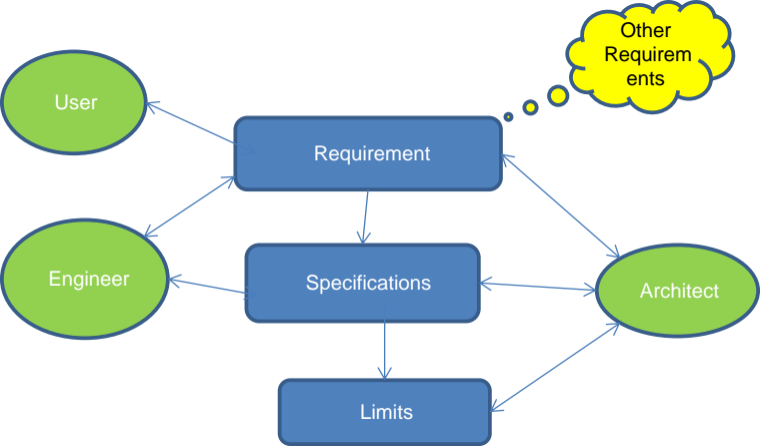

Supplement: MOESM1 [file 11899386]
